# Supplementary material
Source: HighWire-hosted journal article supplement (https://www.life-science-alliance.org/content/6/2/e202201556/F2)

Short exposure

Control

5XFAD

5XFAD:DSCR1 KO

(kDa)

75

IB: BACE1

IB: Gapdh

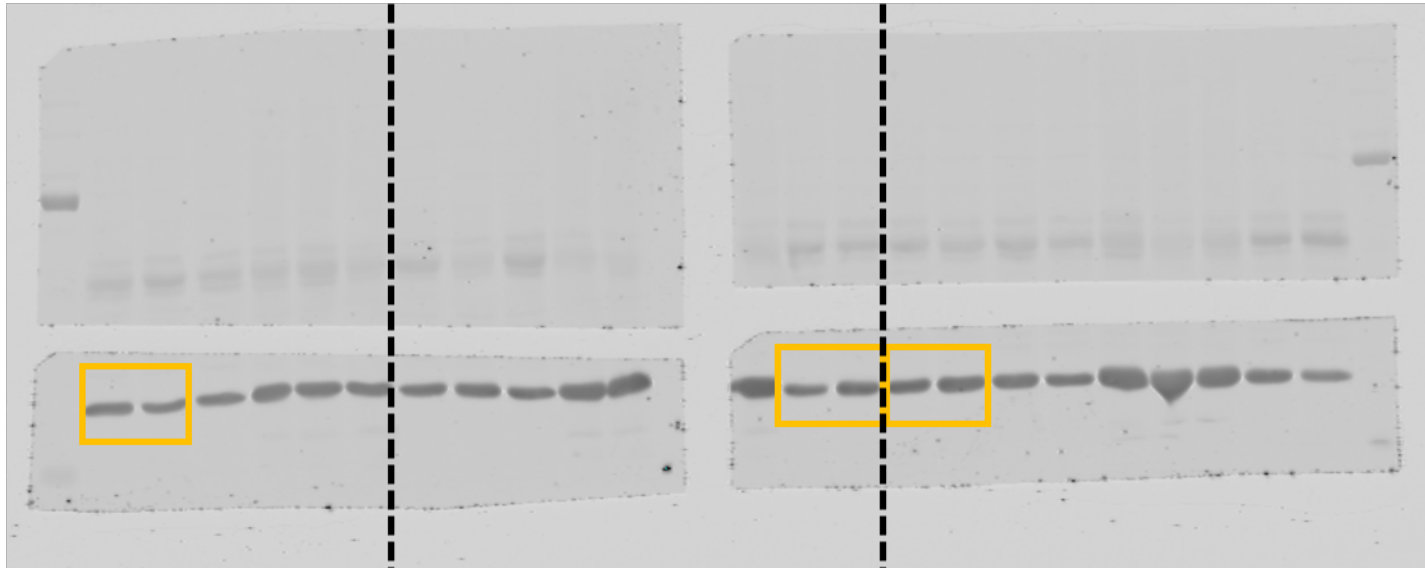

Long exposure

IB: BACE1

IB: Gapdh

75

25

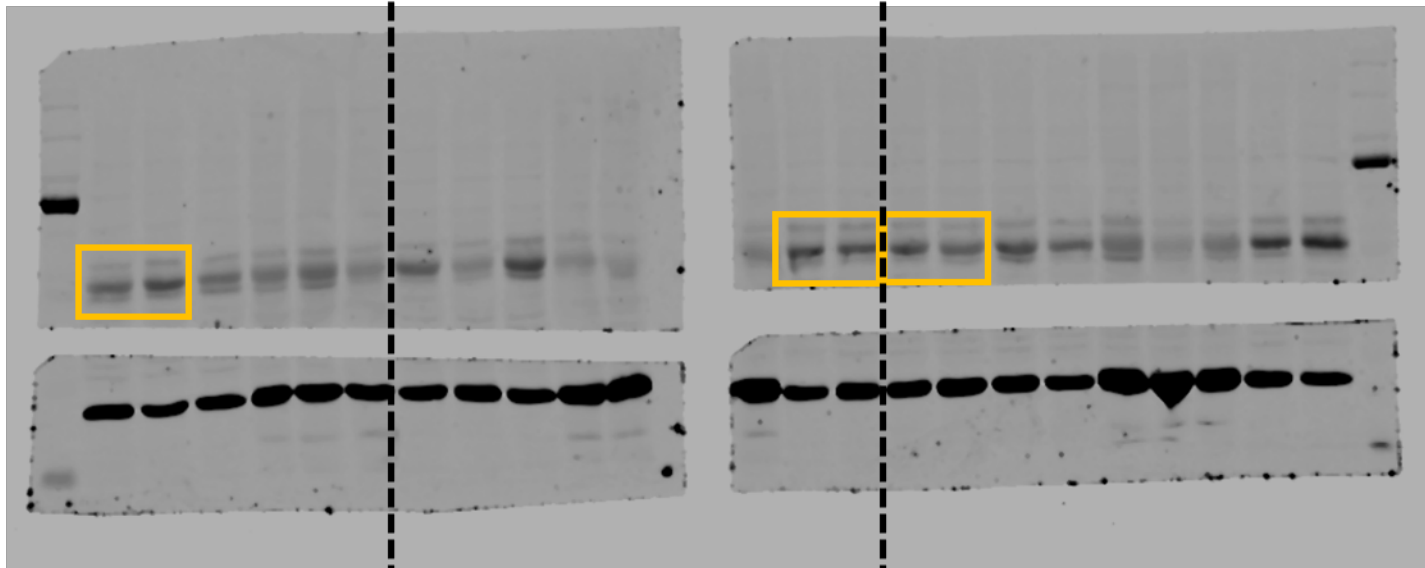

Supplement: inline-supplementary-material-2 [file inline-supplementary-material-2.pdf]
